# Supplementary material for: Synthesis, structure, and characterisation of a ferromagnetically coupled dinuclear complex containing Co(ii) ions in a high spin configuration and thiodiacetate and phenanthroline as ligands and of a series of isomorphous heterodinuclear complexes containing different Co : Zn ratios
Source: Royal Society of Chemistry journal article supplement (doi:10.1039/d3dt02115g), 2023-01-01

**Synthesis, structure, and characterisation of a ferromagnetically coupled dinuclear complex containing Co(II) ions in high spin configuration and thiodiacetate and phenanthroline as ligands and of a series of isomorphous heterodinuclear complexes containing different Co:Zn ratios**

Ana L. Pérez,<sup>a,b</sup> Axel Kemmerer,<sup>a</sup> Alejandro J. Zapata,<sup>a</sup> Rosana Sartoris,<sup>a</sup> Pablo J. Gonzalez,<sup>a</sup> Raul Urteaga,<sup>b,c</sup> Ricardo Baggio,<sup>d</sup> Sebastián Suarez,<sup>d</sup> Carlos A. Ramos,<sup>e</sup> Sergio D. Dalosto,<sup>b,c</sup> Alberto C. Rizzi,<sup>a</sup> and Carlos D. Brondino\*<sup>a</sup>

<sup>a</sup> *Departamento de Física, Facultad de Bioquímica y Ciencias Biológicas, Universidad Nacional del Litoral and CONICET, Ciudad Universitaria, S3000ZAA Santa Fe, Argentina*

<sup>b</sup> *Instituto de Física del Litoral, Universidad Nacional del Litoral - CONICET, Güemes 3450, 3000 Santa Fe, Argentina*

<sup>c</sup> *Facultad de Ingeniería Química, Universidad Nacional del Litoral, Santiago del Estero 2829, 3000 Santa Fe, Argentina*

<sup>d</sup> *Gerencia de Investigación y Aplicaciones, Centro Atómico Constituyentes, Comisión Nacional de Energía Atómica, Buenos Aires, Argentina*

<sup>e</sup> *Instituto de Nanociencia y Nanotecnología, CNEA-CONICET, Centro Atómico Bariloche, 8400 San Carlos de Bariloche, Río Negro, Argentina*

\*E-mail: [brondino@fcb.unl.edu.ar](mailto:brondino@fcb.unl.edu.ar)

Tel: + 54 342 4575213

**Table S1.** Crystallographic parameters together with experimental details for **1**, **3**, and **4**. Crystal data of the Zn(II) and Cu(II) analogues are given for comparison.

For structures **1**, **3** and **4**, data were gathered at room temperature (293K) with an Oxford Diffraction Gemini CCD S Ultra Diffractometer, using Mo K $\alpha$  radiation. Absorption correction was performed with the Multi-scan Software provided in CrysAlis PRO, Oxford Diffraction (2015). General formula of the isomorphous series C<sub>36</sub>H<sub>30</sub>M<sub>2</sub>N<sub>4</sub>O<sub>12</sub>S<sub>3</sub>, with the cationic site **M** being, **1**: **M** = Co; **3**: **M** = Co:55%, Zn: 45%; **4**: **M** = Co: 25%, Zn: 75%; **6**(\*): **M** = Zn; **7**(\*\*): **M** = Cu

*Table S1. Experimental details*

|                                                                                                           | <b>1</b>                                    | <b>3</b>                                    | <b>4</b>                                    | <b>6</b> (*)                                | <b>7</b> (**)                            |
|-----------------------------------------------------------------------------------------------------------|---------------------------------------------|---------------------------------------------|---------------------------------------------|---------------------------------------------|------------------------------------------|
| <b>Cation (M)</b>                                                                                         | Co                                          | (Co: 55%,<br>Zn: 45%)                       | (Co: 25%,<br>Zn: 75%)                       | Zn                                          | Cu                                       |
| <b>Formula weight</b>                                                                                     | 924.68                                      | 930.47                                      | 934.34                                      | 937.56                                      | 933.85                                   |
| <b>Crystal system,<br/>space group</b>                                                                    | Monoclinic,<br>C2/c                         | Monoclinic,<br>C2/c                         | Monoclinic,<br>C2/c                         | Monoclinic,<br>C2/c                         | Monoclinic,<br>C2/c                      |
| <b>Z</b>                                                                                                  | 4                                           | 4                                           | 4                                           | 4                                           | 4                                        |
| <b>a, b, c (Å)</b>                                                                                        | 19.3064 (7),<br>14.3531 (5),<br>13.5255 (4) | 19.3669 (8),<br>14.3494 (5),<br>13.5022 (5) | 19.4449 (4),<br>14.3870 (3),<br>13.5165 (3) | 19.6524 (6),<br>14.4247 (3),<br>13.6567 (4) | 19.269 (9),<br>14.441 (2),<br>13.813 (4) |
| <b><math>\beta</math> (°)</b>                                                                             | 105.974 (5)                                 | 106.231 (4)                                 | 106.473 (2)                                 | 106.958 (4)                                 | 107.49 (2)                               |
| <b>V (Å<sup>3</sup>)</b>                                                                                  | 3603.3 (2)                                  | 3602.7 (2)                                  | 3626.09(15)                                 | 3703.07(3)                                  | 3665.8(54)                               |
| <b><math>\mu</math> (mm<sup>-1</sup>)</b>                                                                 | 1.17                                        | 1.35                                        | 1.47                                        | 1.58                                        | 1.43                                     |
|                                                                                                           |                                             |                                             |                                             |                                             |                                          |
| <b>No. of measured,<br/>independent and<br/>observed [<math>I &gt; 2\sigma(I)</math>]<br/>reflections</b> | 30895,<br>4449, 3718                        | 38617,<br>4610, 4174                        | 19602,<br>4389, 3700                        |                                             |                                          |
| <b>R<sub>int</sub></b>                                                                                    | 0.047                                       | 0.036                                       | 0.044                                       |                                             |                                          |
| <b>(sin <math>\theta/\lambda</math>)<sub>max</sub> (Å<sup>-1</sup>)</b>                                   | 0.680                                       | 0.687                                       | 0.685                                       |                                             |                                          |
| <b>R[F<sup>2</sup>&gt;2<math>\sigma</math>(F<sup>2</sup>)],<br/>wR(F<sup>2</sup>), S</b>                  | 0.034,<br>0.080, 1.39                       | 0.024,<br>0.060, 1.05                       | 0.031,<br>0.070, 1.05                       |                                             |                                          |
| <b>No. of reflections</b>                                                                                 | 4449                                        | 4610                                        | 4389                                        |                                             |                                          |
| <b><math>\Delta\rho_{max}</math>, <math>\Delta\rho_{min}</math> (e Å<sup>-3</sup>)</b>                    | 0.81, -0.42                                 | 0.36, -0.35                                 | 0.31, -0.47                                 |                                             |                                          |

Symmetry code: (i) 1/2-x, 1/2-y, -z

(\*) Neuman, Burna et al. 2015; CSD code DUHXEL.

(\*\*) Baggio, Garland et al. 1999; CSD code BEBQII

**Table S2.** Geometric parameters (Å, °)

|                              | <b>1</b>    | <b>3</b>    | <b>4</b>    | <b>6</b>   | <b>7</b>   |
|------------------------------|-------------|-------------|-------------|------------|------------|
| <b>M—O1A</b>                 | 2.0425 (13) | 2.0363 (9)  | 2.0366 (13) | 2.0357(14) | 1.976(3)   |
| <b>M—O3A<sup>i</sup></b>     | 2.0506 (13) | 2.0595 (9)  | 2.0931 (12) | 2.0724(14) | 2.320(3)   |
| <b>M—N2</b>                  | 2.1017 (15) | 2.0992 (11) | 2.1080 (15) | 2.0994(15) | 2.016(3)   |
| <b>M—O3A</b>                 | 2.1125 (12) | 2.0942 (10) | 2.0661 (12) | 2.1106(13) | 1.974(3)   |
| <b>M—N1</b>                  | 2.1254 (15) | 2.1227 (11) | 2.1147 (15) | 2.1176(16) | 2.029(3)   |
| <b>M—S1A</b>                 | 2.6574 (5)  | 2.6081 (4)  | 2.5257 (5)  | 2.6841(6)  | 2.7241(17) |
|                              |             |             |             |            |            |
| <b>O1A—M—O3A<sup>i</sup></b> | 92.97 (5)   | 92.93 (4)   | 92.67 (5)   | 93.37(6)   | 92.37(11)  |
| <b>O1A—M—N2</b>              | 92.28 (6)   | 91.74 (4)   | 90.38 (6)   | 92.46(6)   | 91.44(12)  |
| <b>O3A<sup>i</sup>—M—N2</b>  | 104.91 (6)  | 102.86 (4)  | 99.27 (5)   | 105.51(6)  | 99.69(10)  |
| <b>O1A—M—O3A</b>             | 92.40 (5)   | 92.61 (4)   | 93.15 (5)   | 92.31(6)   | 92.18(11)  |
| <b>O3A<sup>i</sup>—M—O3A</b> | 78.83 (5)   | 78.82 (4)   | 78.78 (5)   | 78.70(5)   | 78.10(10)  |
| <b>N2—M—O3A</b>              | 173.84 (6)  | 175.25 (4)  | 176.04 (5)  | 173.43(6)  | 175.84(11) |
| <b>O1A—M—N1</b>              | 164.52 (6)  | 165.20 (4)  | 165.64 (5)  | 164.16(6)  | 169.34(12) |
| <b>O3A<sup>i</sup>—M—N1</b>  | 101.61 (6)  | 100.28 (4)  | 98.02 (5)   | 101.74(6)  | 96.69(11)  |
| <b>N2—M—N1</b>               | 79.06 (6)   | 78.89 (4)   | 78.49 (6)   | 79.05(6)   | 81.54(12)  |
| <b>O3A—M—N1</b>              | 95.47 (5)   | 96.46 (4)   | 98.30 (6)   | 95.25(6)   | 95.17(11)  |
| <b>O1A—M—S1A</b>             | 79.50 (4)   | 80.38 (3)   | 82.01 (4)   | 79.10(4)   | 80.64(9)   |
| <b>O3A<sup>i</sup>—M—S1A</b> | 155.88 (4)  | 157.22 (3)  | 159.63 (4)  | 155.48(4)  | 157.53(7)  |
| <b>N2—M—S1A</b>              | 98.30 (4)   | 99.11 (3)   | 100.40 (4)  | 98.15(4)   | 101.80(9)  |
| <b>O3A—M—S1A</b>             | 78.63 (4)   | 79.76 (3)   | 81.89 (4)   | 78.33(4)   | 80.84(8)   |
| <b>N1—M—S1A</b>              | 88.99 (5)   | 89.73 (3)   | 91.01 (4)   | 88.82(4)   | 92.91(9)   |

Symmetry code: (i) 1/2-x,1/2-y,-z

**Table S3.** Hydrogen bonding interactions. Distances and angles are in Å and °, respectively.

| <b>Compound</b> | <b><i>D—H</i>⋯<i>A</i></b>                          | <b><i>D—H</i></b><br>( <i>d</i> ) | <b><i>H</i>⋯<i>A</i></b><br>( <i>d</i> ) | <b><i>D</i>⋯<i>A</i></b><br>( <i>d</i> ) | <b><i>D—H</i>⋯<i>A</i></b><br>(∠) |
|-----------------|-----------------------------------------------------|-----------------------------------|------------------------------------------|------------------------------------------|-----------------------------------|
| <b>1</b>        | O1 <i>B</i> —H1 <i>B</i> ⋯O2 <i>A</i> <sup>ii</sup> | 0.80 (1)                          | 1.78 (1)                                 | 2.551 (2)                                | 162 (2)                           |
| <b>3</b>        | O1 <i>B</i> —H1 <i>B</i> ⋯O2 <i>A</i> <sup>ii</sup> | 0.82 (1)                          | 1.75 (1)                                 | 2.5463 (14)                              | 164 (2)                           |
| <b>4</b>        | O1 <i>B</i> —H1 <i>B</i> ⋯O2 <i>A</i> <sup>ii</sup> | 0.81 (1)                          | 1.75 (1)                                 | 2.547 (2)                                | 165 (3)                           |
| <b>6</b>        | O1 <i>B</i> —H1 <i>B</i> ⋯O2 <i>A</i> <sup>ii</sup> | 0.84(5)                           | 1.76(4)                                  | 2.550(2)                                 | 154(6)                            |
| <b>7</b>        | O1 <i>B</i> —H1 <i>B</i> ⋯O2 <i>A</i> <sup>ii</sup> | 0.70(5)                           | 1.88(5)                                  | 2.580(5)                                 | 176(8)                            |

Symmetry code: (ii)  $-x+1/2, y+1/2, -z+1/2$ .

**Fig. S1.** FTIR spectra of Thiodiacetic Acid (TDA, green line), phenanthroline (Phen, pink line), and **1** (black line).

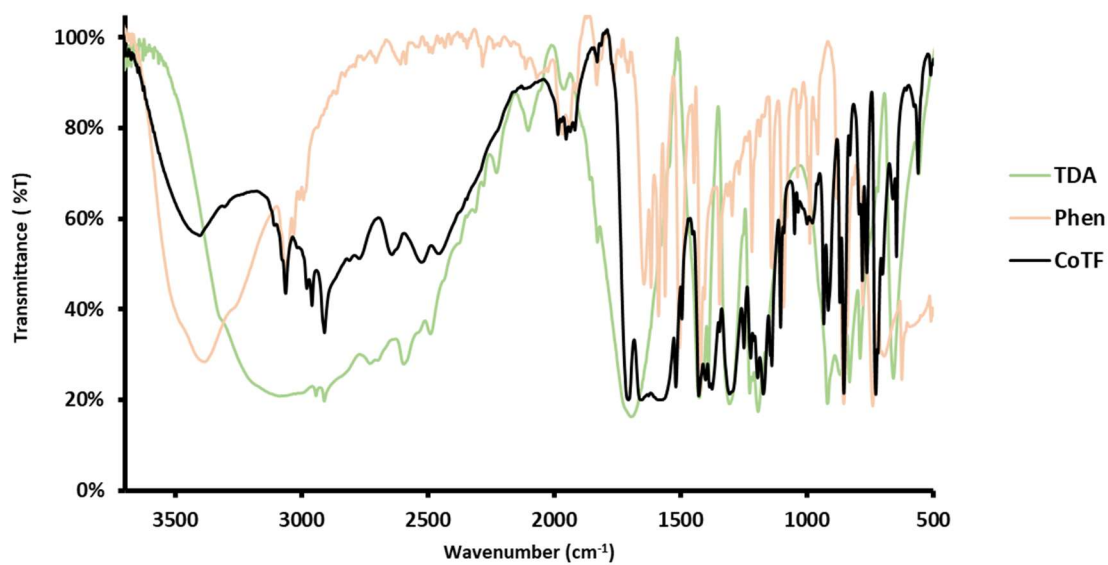

**Fig. S2.** Visible spectra of **1** and **5** in solid state (powder). Similar results were obtained in single-crystal samples. This figure was designed to compare peak positions and line shape of spectra in **1** and **5**. Note that the relative intensities of the bands are not indicative of the Co amount in each sample since we used a higher proportion of **5** in Na<sub>2</sub>SO<sub>4</sub> to increase spectral sensitivity.

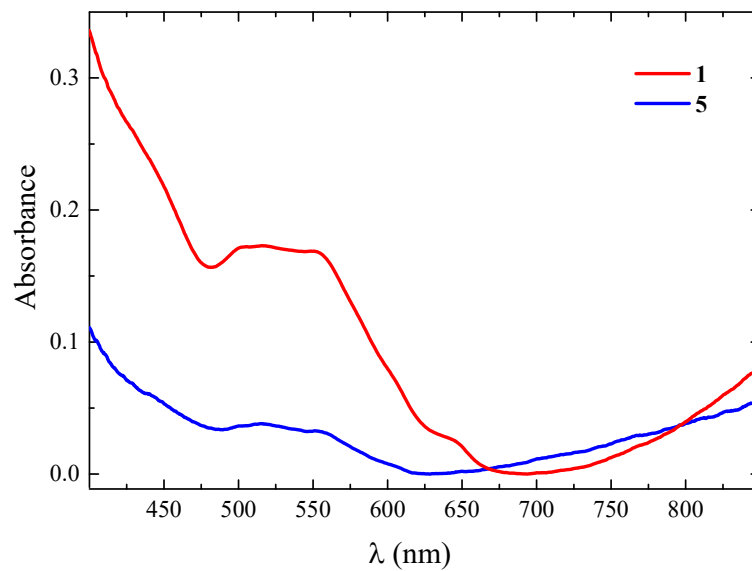

**Fig. S3.** Powder X-ray diffractograms of **1-5**.

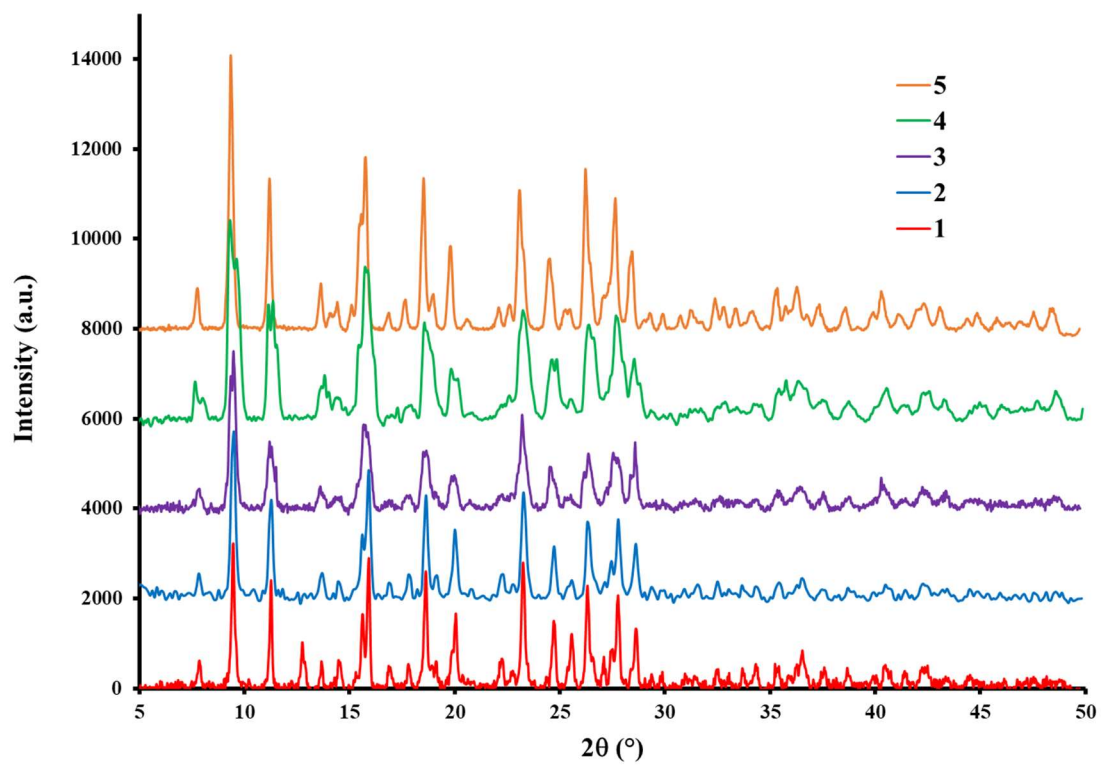

**Fig. S4.** Structural superposition of the dinuclear units of **1**, **3**, **4**, **6** (solid lines), and **7** (dash lines).

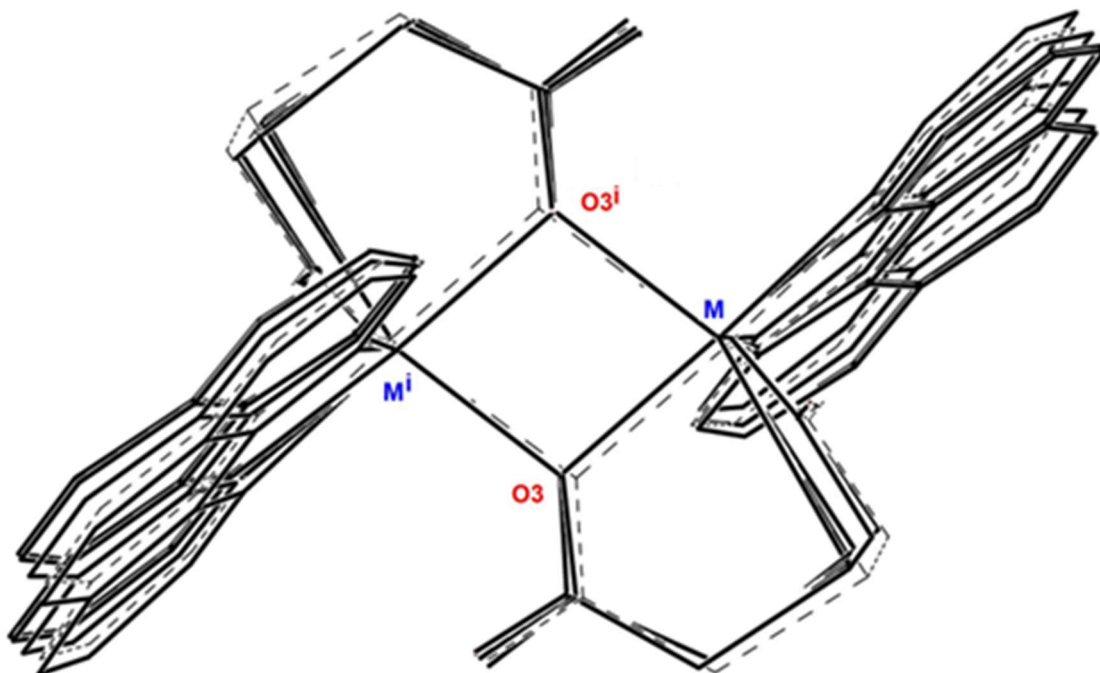



**Fig. S5.** **a)** Perspective views of Hirshfeld surface of **1** mapped with  $d_{\text{norm}}$ . Neighbouring molecules are not drawn for clarity. **b)** Perspective view of Hirshfeld surface of **1** and the closest neighbouring A- and B-type dimers (see also Figure 2, upper panel, in the text). The intense red region corresponds to the interaction between two tda molecules that bridge two magnetically inequivalent Co(II) ion dimers at 19.925 Å (Figure 2 in the text, lower panel). The Hirshfeld surfaces were calculated using Crystal Explorer Ver. 21.5 based on the X-ray data of **1**.

**a)**

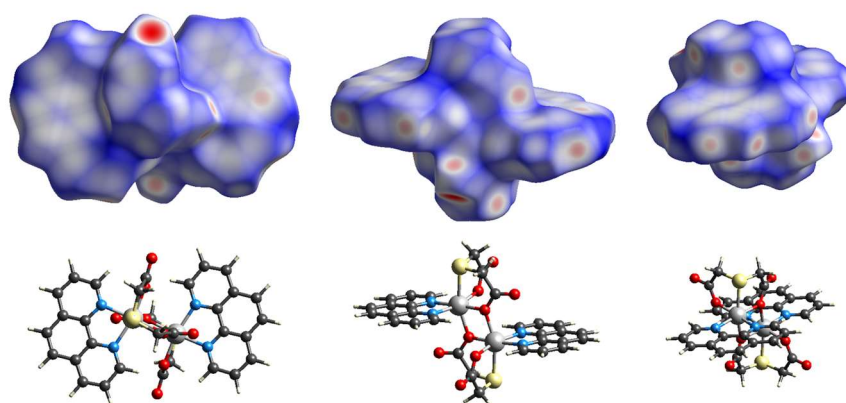

**b)**

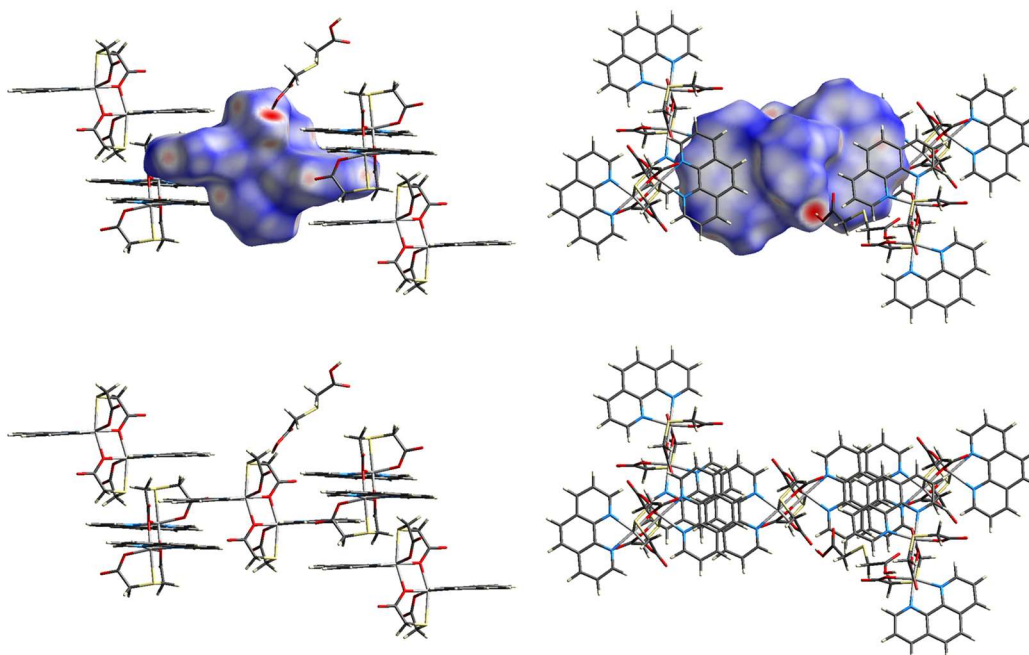

Supplement: d3dt02115g1.pdf [file d3dt02115g1.pdf]
